# Supplementary material for: Reciprocal Alterations in Osteoprogenitor and Immune Cell Populations in Rheumatoid Synovia
Source: MDPI journal article supplement (doi:10.3390/ijms232012379), 2022-10-16
Supplement: s1 [file s1]

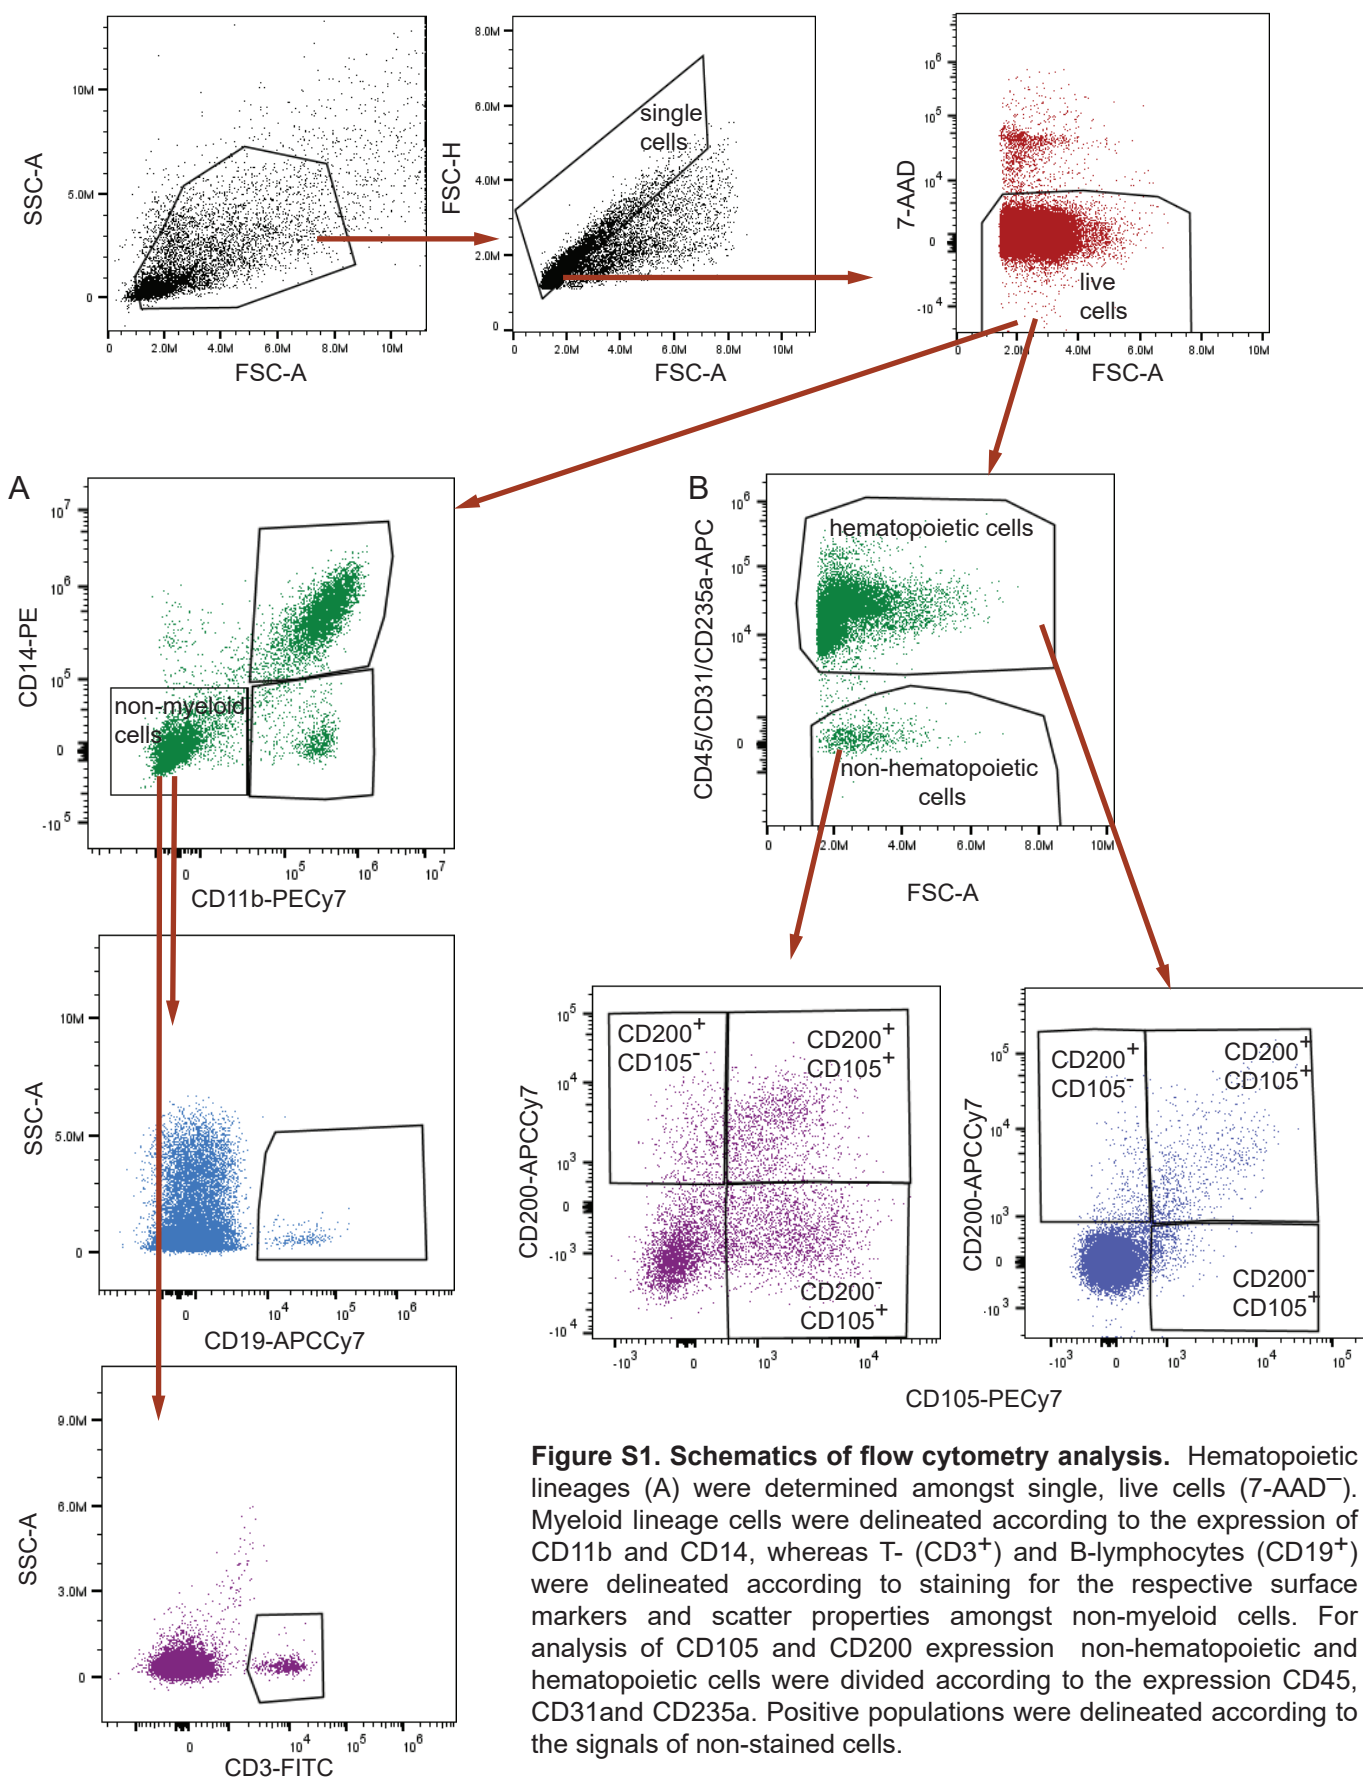

**Figure S1. Schematics of flow cytometry analysis.** Hematopoietic lineages (A) were determined amongst single, live cells (7-AAD<sup>-</sup>). Myeloid lineage cells were delineated according to the expression of CD11b and CD14, whereas T- (CD3<sup>+</sup>) and B-lymphocytes (CD19<sup>+</sup>) were delineated according to staining for the respective surface markers and scatter properties amongst non-myeloid cells. For analysis of CD105 and CD200 expression non-hematopoietic and hematopoietic cells were divided according to the expression CD45, CD31 and CD235a. Positive populations were delineated according to the signals of non-stained cells.
